# Supplementary material for: Antimicrobial Potential of Betulinic Acid and Investigation of the Mechanism of Action against Nuclear and Metabolic Enzymes with Molecular Modeling
Source: MDPI journal article supplement (doi:10.3390/pathogens12030449), 2023-03-13

## IN VITRO EVALUATION OF THE ANTIMICROBIAL POTENTIAL OF BETULINIC ACID AND ANALYSIS OF MECHANISMS OF ACTION WITH MOLECULAR MODELING

Gabriela Cristina Soares Rodrigues<sup>1</sup>, Mayara dos Santos Maia<sup>1</sup>, Thalisson Amorim de Souza<sup>2</sup>, Edeltrudes de Oliveira Lima<sup>3</sup>, Luiz Eduardo C. G. dos Santos<sup>3</sup>, Shellygton Lima Silva<sup>3</sup>, Marcelo Sobral da Silva<sup>2</sup>, José Maria Barbosa Filho<sup>2</sup>; Valnês da S. Rodrigues-Junior<sup>4,5</sup>, Luciana Scotti<sup>1</sup>, Marcus Tullius Scotti<sup>1</sup>.

<sup>1</sup>Laboratory of Cheminformatics, Program of Natural and Synthetic Bioactive Products (PgPNSB), Health Sciences Center, Federal University of Paraíba, João Pessoa-PB, Brazil

<sup>2</sup> Multi-User Characterization and Analysis Laboratory, Program of Natural and Synthetic Bioactive Products (PgPNSB), Health Sciences Center, Federal University of Paraíba, João Pessoa-PB, Brazil.

<sup>3</sup>Program of Natural and Synthetic Bioactive Products (PgPNSB), Health Sciences Center, Federal University of Paraíba, 58051-900, João Pessoa-PB, Brazil

<sup>4</sup>National Institute of Science and Technology in Tuberculosis (INCT-TB), Brazil

<sup>5</sup>Program of Biotechnology, Center for Biotechnology, Federal University of Paraíba, Campus I, Cidade Universitária, João Pessoa 58051-900, PB, Brazil.

Correspondence: luciana.scotti@gmail.com; Tel.: +55 83 99624 5075

**Table S1.** Access codes of selected protein sequences obtained from the GenBank database.

|                                   | DNA gyrase | beta-lactamase | PBP            |
|-----------------------------------|------------|----------------|----------------|
| <i>Staphylococcus aureus</i>      | BAR07518.1 | KSA62127.1     | BBA24197.1     |
| <i>S. epidermidis</i>             | KSZ68723.1 | RUN10939.1     | EJE17909.1     |
| <i>Pseudomonas aeruginosa</i>     | OHQ53593.1 | KJJ11413.1     | TEF07458.1     |
| <i>Escherichia coli</i>           | KHJ14714.1 | KXG94406.1     | ARB43848.1     |
| <i>Mycobacterium tuberculosis</i> | AIH53390.1 | KMY17933.1     | QRX86232.1     |
|                                   | CYP51      | SAP-2          | DHFR           |
| <i>Candida albicans</i>           | AIQ80983.1 | AAM21051.1     | AAC05610.1     |
| <i>C. tropicalis</i>              | QXT50470.1 | AAD33216.1     | XP_002550914.1 |
| <i>C. glabrata</i>                | KTB23913.1 | -              | KTB19277.1     |

|                             |            |   |            |
|-----------------------------|------------|---|------------|
| <i>Aspergillus flavus</i>   | QOR32183.1 | - | RMZ41744.1 |
| <i>Penicillium citrinum</i> | -          | - | -          |
| <i>Trichophyton rubrum</i>  | -          | - | OAL62276.1 |
| <i>Microsporium canis</i>   | -          | - | EEQ31600.1 |

**Table S2.** PDB codes of template proteins and degree of identity proteins of interest.

| Species                    | Protein        | ID PDB molde | Identity |
|----------------------------|----------------|--------------|----------|
| <i>S. epidermidis</i>      | DNA gyrase     | 5NPP         | 93.83%   |
|                            | beta-lactamase | 1XA1         | 94.90%   |
|                            | PBP            | 3VSL         | 83.18%   |
|                            | SAP-2          | 2H6S         | 51.20%   |
| <i>C. tropicalis</i>       | DHFR           | 1AOE         | 81.25%   |
| <i>A. flavus</i>           | CYP51          | 6CR2         | 64.03%   |
| <i>Trichophyton rubrum</i> | DHFR           | 6DRS         | 48.97%   |

**Table S3.** Percentage of amino acids present in the allowed and favored regions of the Ramachandran plot for each model and percentage of the degree of compatibility between the 3D structure and the 1D amino acid sequence, based on the models generated by Verify 3D.

| Species                    | Protein        | Ramachandran | Verify 3D |
|----------------------------|----------------|--------------|-----------|
| <i>S. epidermidis</i>      | DNA gyrase     | 99.3%        | 89.63%    |
|                            | beta-lactamase | 97.8%        | 100%      |
|                            | PBP            | 98.5%        | 90.52%    |
|                            | SAP-2          | 98.7%        | 93.15%    |
| <i>C. tropicalis</i>       | DHFR           | 100%         | 92.23%    |
| <i>A. flavus</i>           | CYP51          | 98.8%        | 93.02%    |
| <i>Trichophyton rubrum</i> | DHFR           | 100%         | 97.51%    |

**Table S4.** RMSD values for the proteins selected in the study.

| Species                | Protein        | PDB ligand       | RMSD |
|------------------------|----------------|------------------|------|
| <i>S. aureus</i>       | DNA gyrase     | E32              | -    |
|                        | beta-lactamase | benzylpenicillin | 0.29 |
|                        | PBP            | cefotaxime       | 0.30 |
| <i>P. aeruginosa</i>   | DNA gyrase     | EZ6              | 0.25 |
|                        | beta-lactamase | imipenem         | 0.32 |
|                        | PBP            | imipenem         | 0.44 |
| <i>E. coli</i>         | DNA gyrase     | 6G9              | 0.25 |
|                        | beta-lactamase | ácido borônico   | 0.23 |
|                        | PBP            | -                | -    |
| <i>M. tuberculosis</i> | DNA gyrase     | MDP              | 0.29 |
|                        | beta-lactamase | amoxicilin       | 0.42 |
|                        | PBP            | ampicilin        | 0.30 |
| <i>C. albicans</i>     | CYP            | posaconazole     | 0.83 |
|                        | SAP-2          | benzamidine      | 0.19 |

|                      |      |     |      |
|----------------------|------|-----|------|
|                      | DHFR | N22 | 0.61 |
| <i>C. tropicalis</i> | CYP  | -   | -    |
| <i>C. glabrata</i>   | CYP  | -   | -    |
| <i>A. flavus</i>     | DHFR | H8A | 0.32 |

**Figure S1.** Alignment of DNA gyrase enzyme sequences from selected bacteria in the study. The gray regions correspond to non-similar and non-identical amino acids. The red regions correspond only to identical amino acids. The yellow regions are similar amino acids. The black boxes represent the active site amino acids.

|                        |                                                                |     |
|------------------------|----------------------------------------------------------------|-----|
| <i>M. tuberculosis</i> | MTDTTLPPDDSLDRLEPVDIQQMQRSYIDYAMSVIVGRALPEVRDGLKPVHRRVLYAMF    | 60  |
| <i>S. aureus</i>       | MKEELLMAELPQSRINERNITSEMRESFLDYAMSVIVARALPDVRDGLKPVHRRILYGLN   | 60  |
| <i>S. epidermidis</i>  | -----MAELPQSRINERNITSEMRESFLDYAMSVIVSRALPDVRDGLKPVHRRILYGLN    | 54  |
| <i>P. aeruginosa</i>   | -----MGELA-KETLPVNIEDELKQSYLDYAMSVIVGRALPDARDGLKPVHRRVLYAMS    | 53  |
| <i>E. coli</i>         | -----MSDLA-REITPVNIEEELKSSYLDYAMSVIVGRALPDVRDGLKPVHRRVLYAMN    | 53  |
| <i>M. tuberculosis</i> | DSFRFPDPSHAKSARSVAETMGNHYHPHGDASITLVRMAQPSWLSRYPLVDGQGNFGSPG   | 120 |
| <i>S. aureus</i>       | EQGMTFPDKSYKKSARIVGDVMGKYHHPHGDSSIIEAMVRMAQDFSRYRPLVDGQGNFGSMD | 120 |
| <i>S. epidermidis</i>  | EQGMTFPDKPYKKSARIVGDVMGKYHHPHGDSSIIEAMVRMAQDFSRYRPLVDGQGNFGSMD | 114 |
| <i>P. aeruginosa</i>   | ELGNDWNKPYKKSARVVGDVIGKYHHPHGDIAVDTIVRMAQPFSLRYMLVDGQGNFGSV    | 113 |
| <i>E. coli</i>         | VLGNDWNKAYKKSARVVGDVIGKYHHPHGDIAVDTIVRMAQPFSLRYMLVDGQGNFGSID   | 113 |
| <i>M. tuberculosis</i> | NDPPAMRYTEARLTPLAMEMLREIDEETVDFIPNYDGRVQEPTVLSRFPNLLANGSGG     | 180 |
| <i>S. aureus</i>       | GGGAAMRYTEARMTKITLELLRDINKDTIDFIDNYDGNEREPSVLEAFRFPNLLANGASG   | 180 |
| <i>S. epidermidis</i>  | GGGAAMRYTEARMTKITLELLRDINKDTIDFIDNYDGNEREPSVLEAFRFPNLLVNGAAG   | 174 |
| <i>P. aeruginosa</i>   | GNNAAMRYTEVMAKLAHELLADLEKETVDWVPNYDGTEQIEAVMPTKIPNLLVNGSSG     | 173 |
| <i>E. coli</i>         | GSAAAMRYTEIRLAKIAHELLMADLEKETVDFVDNYDGTEKIPDMPTKIPNLLVNGSSG    | 173 |
| <i>M. tuberculosis</i> | IAVGMATNIPPHNIRELADAVFWALENHDADEEETLAAVMGRVKGPDFFPTAGLIVSQGT   | 240 |
| <i>S. aureus</i>       | IAVGMATNIPPHNITELINGVLSLSKNPD----ISIAELMEDIEGPDFFPTAGLILKSGI   | 236 |
| <i>S. epidermidis</i>  | IAVGMATNIPPHNITEVIDGVLSLSKNPD----ITINELMEDIQGPDPPTAGLVLGKSGI   | 230 |
| <i>P. aeruginosa</i>   | IAVGMATNIPPHNLGEVIDGCLALMDNPD----LTVDELMLQYIPGDPFPPTAGIINGRAGI | 229 |
| <i>E. coli</i>         | IAVGMATNIPPHNITEVINGCLAYIDDED----ISIEGLMEHIPGDPFPPTAAIINGRGI   | 229 |
| <i>M. tuberculosis</i> | ADAYKTGRGSIQMSRAVIE--EDSRGRTSLVITELFYQVNHDFNTSIAEQVRDGLKLAG    | 298 |
| <i>S. aureus</i>       | RRAYETGRGSIQMSRAVIE--ERGGGRQRIIVTEIFQVKNKARMEKIAELVRDCKIDG     | 294 |
| <i>S. epidermidis</i>  | RRAYETGRGSIQMSRAVIE--ERGGGRQRIIVTEIFQVKNKARMEKIAELVRDCKIDG     | 288 |
| <i>P. aeruginosa</i>   | IEAYRTGRGRIYIRARAVVEEMEGGREGQIIITELEFYQLNKARLEKIAELVKEKKIEG    | 289 |
| <i>E. coli</i>         | EEAYRTGRGKVYIRARAEVEV-DAKTGRETIIVHETIFYQVKNKARLEKIAELVKEKRV    | 288 |
| <i>M. tuberculosis</i> | ISNIEDQSSDRVGLIVIEIKRDAVAKVWINNLYKHTQLQTSFGANMLAIVDGVPTLR      | 358 |
| <i>S. aureus</i>       | ITDLREETSLRTGVFVVIDVRKDANASVILNNLYKQTPLQTSFGVMIALVNGRPKLINL    | 354 |
| <i>S. epidermidis</i>  | ITDLREETSLRTGVFVVIDVRKDANASVILNNLYKQTPLQTSFGVMIALVNGRPKLINL    | 348 |
| <i>P. aeruginosa</i>   | ISELRDES-DKDGMRVVIELRRGEVGEVVLNNLYAQTLQSVFGINVVVALVDGQPTLR     | 348 |
| <i>E. coli</i>         | ISALRDES-DKDGMRVVIIEVKRDAVGEVVLNNLYSQTLQVSEGINMVALHHCQPKIMNL   | 347 |
| <i>M. tuberculosis</i> | DQLIRYVVDHQLDVIVRRTTYRLRKANERAHILRGLVKALDALDEVIALIRASETVDIAR   | 418 |
| <i>S. aureus</i>       | KEALVHYLEHQKTVVRRTTYRLRKAKDRAHILEGLRIALDHIDEITSTIRESDTKVAM     | 414 |
| <i>S. epidermidis</i>  | KEALVHYLEHQKTVVRRTTYRLRKAKDRAHILEGLRIALDHIDEITSTIRESDTKIAM     | 408 |
| <i>P. aeruginosa</i>   | KDMLVFRHRREVTTRRTTYRLRKARERGHILEGQAVALSNIQVIELIKSSPTPAEAK      | 408 |
| <i>E. coli</i>         | KDIIAFAVFRHRREVTTRRTTYRLRKARDRAHILEALAVANIDPIIELIRHAPTPAEAK    | 407 |

**Figure S2.** Alignment of beta-lactamase enzyme sequences from selected bacteria in the study. The gray regions correspond to non-similar and non-identical amino acids. The red regions correspond only to identical amino acids. The yellow regions are similar amino acids.

|                  |                                 |    |
|------------------|---------------------------------|----|
| <i>S. aureus</i> | -----MAKLLTMSVVSFCFIFLLLVF----- | 21 |
|------------------|---------------------------------|----|

|                        |                                                               |     |
|------------------------|---------------------------------------------------------------|-----|
| <i>S. epidermidis</i>  | -----MAKLLIMSVVSFCFIFLLLVF-----                               | 21  |
| <i>P. aeruginosa</i>   | -LVWARGFGYADRQH---RINASEHTAFHAGDLSLLIASATLQLAERGQLSLDAPLQD    | 119 |
| <i>M. tuberculosis</i> | -TLYAKGFGVRDVGKGGGPDNKVDADTVFQLASVSKSVGATVVAHAVTDNVVTWDTTPVVS | 177 |
| <i>E. coli</i>         | RQRF--VYGVDVAS---QKANTLDTVYELGSMKAFTGLVVQILIQEGRLRQGGDIIT     | 104 |
| <i>S. aureus</i>       | -----FRYI-----LKRYFNYSLNKVVWYLTMLAGL                          | 47  |
| <i>S. epidermidis</i>  | -----FRYI-----LKRYFNYSLNKVVWYLTMLAGL                          | 47  |
| <i>P. aeruginosa</i>   | TLREFYVRSRFHADQSEADRAITFRRLLSHQSGLPGEHLPLFGERPNSLQQLPAKVSGV   | 179 |
| <i>M. tuberculosis</i> | KLPWFALRDPYV-----TGQVTIADLYSHRSGLPDHAGDLLEDLG--YDRRQVLQRLKY   | 229 |
| <i>E. coli</i>         | YLPFMRLNYQGK-----PASLTVADFLYHTSGLPFSTLARLENPMPGSAVAQQLRNENL   | 158 |
| <i>S. aureus</i>       | IPFIPIKFSFIKFNVNQ-APTVE---SKSHDLNHNINTTKPIQEFTTDIHKFNWDSID    | 103 |
| <i>S. epidermidis</i>  | IPFIPIKFSFIKFNVNQ-SPTVE---SRSHDLNHNINTTKPVQEFTTDIHKFNWDSID    | 103 |
| <i>P. aeruginosa</i>   | WLSNPPGTQVAHSNLGYELVGAAIERNTGKHFEQHMREHLLDPLQMTRSS-----       | 229 |
| <i>M. tuberculosis</i> | LPLAPFRI SYAYTFGVTAAGAAVAAAAGQSWEDLSDEVLYRPLGMGSTS-----       | 279 |
| <i>E. coli</i>         | LFAPGAKFSYASANYDVL--GAVIENVTKTFTTEVIAERLTQPLGMSATV-----       | 206 |
| <i>S. aureus</i>       | NICTVIWIVLVIIISFKFLKALLYLKYLKQSLYLNENEKNKIDTILFNHQYKKNIVIRK   | 163 |
| <i>S. epidermidis</i>  | NICTVIWIVLVIIISFKFLKSLLYLKYLKQSLYLNENEKNKIDTILFNHQYKKNIVIRK   | 163 |
| <i>P. aeruginosa</i>   | -----FAR-----NAL-----PQAQRAHGYSGG-----                        | 247 |
| <i>M. tuberculosis</i> | -----SRF-----TDFLARPN---HAVNHVKVADRWEAR-----                  | 305 |
| <i>E. coli</i>         | -----AVK-----GDEIIVNK-----ASGYKLG-----                        | 224 |
| <i>S. aureus</i>       | AEAIQSPITFWYGKYIILIPSSYFKVIDKRLKYI--ILHEYAHAKNRDTHLIIIFNIFS   | 221 |
| <i>S. epidermidis</i>  | AETIQSPITFWYGKYIILIPSSYFKVIDKRLKYI--ILHEYAHAKNRDTHLIIIFNIFS   | 221 |
| <i>P. aeruginosa</i>   | ---G-R-----PGSASDLFVNDLWSSPVDLSRFVRMLFANGRHKERQ-----          | 285 |
| <i>M. tuberculosis</i> | ---YQR-----DPDAQSPAGGVSSSLNDMTHWLMVADGVYNGRR-----             | 343 |
| <i>E. coli</i>         | ---FGKPVLFHAPLARNHVEAAYIHHTLPLDMEIWI DAWLHRKALPATL-----       | 269 |
| <i>S. aureus</i>       | IIMSYNPLVHVIVKRKIIHDNEVEADRFVLNNINKNEFKTYAESIMDSVL-----KTPFS  | 275 |
| <i>S. epidermidis</i>  | IVMSYNPLIHIVKRKIIHDNEVEADRFVLNNINKNEFKTYAESIMDSVL-----NIPFF   | 275 |
| <i>P. aeruginosa</i>   | -LLRKHSVEEMFRQQNAG-NAL---DFD-----CQVGLAWF-LSPCGSAPLEGGIRHY    | 332 |
| <i>M. tuberculosis</i> | -ITSPEALLPVYTPQVISRHPVSPRARA-----SFYGYGFN-VGVTSSEGR---TEYS    | 390 |
| <i>E. coli</i>         | ---REAMSNSWRG--NSDVPLAADN-R-----ILYASGWFIQDN---Q---GPYI       | 307 |

**Figure S3.** Alignment of PBP enzyme sequences from selected bacteria in the study. The gray regions correspond to non-similar and non-identical amino acids. The red regions correspond only to identical amino acids. The yellow regions are similar amino acids.

|                        |                                                              |     |
|------------------------|--------------------------------------------------------------|-----|
| <i>M. tuberculosis</i> | MVTKTT-----LASATSGLLLLAVAMSGCTPRPQGPAAEKFFAAIA               | 44  |
| <i>S. aureus</i>       | ML--KRLKEKSNDEIVQNTINKRINFIFGVIVFIFAVLVRLG-----YLQ           | 44  |
| <i>S. epidermidis</i>  | ML--KRLKEKTNDEKMRNTMNKRINFIFGFIVFIFAVLVRLG-----YLQ           | 44  |
| <i>P. aeruginosa</i>   | -----MKLNYFQGALYPWRFVIVCLLLAMVGATVWRIV-----DLH               | 37  |
| <i>E. coli</i>         | MKAAAKTQKPKRQEEHANFISWRFALLCGCILLALAFLLGRVA-----WLQ          | 46  |
| <i>M. tuberculosis</i> | IGDTASAAQLSDNPNEAREALNAAWAGLQAAHLDAQVLSAKYAEDETTVAYRFSWHLPKD | 104 |
| <i>S. aureus</i>       | IAQGSHYKQIIKNDENITV-----NESVPRGRILDRNGK---VLVDNASKM          | 87  |
| <i>S. epidermidis</i>  | IAQGSHYKQLIKNDENITV-----NESVPRGRILDRNGK---VLVDNASKM          | 87  |
| <i>P. aeruginosa</i>   | VIDHDFLKGQGDARSVRHI-----AIPAHRLITDRNGE---PLAVSTPVT           | 80  |
| <i>E. coli</i>         | VISPDMLVKEGDMRSLRVQ-----QVSTSRGMITDRSQR---PLAVSVPVK          | 89  |
| <i>M. tuberculosis</i> | RIWTYDGQL-----KMA-----RDEGRWHVRWTTSGLLHPKLGEHQT              | 140 |
| <i>S. aureus</i>       | AITYTRGRKTTQSEMLDTAEKLSKLIKMDTKKITERDKKDFWIQ-----LHPKKAKAMM  | 141 |
| <i>S. epidermidis</i>  | SITYTRNRKTSQKEMLNTAKKLTDLIKMDTDKITERDKKDFWIQ-----MYPSSAKKLM  | 141 |
| <i>P. aeruginosa</i>   | TLWAN-----PKELM-----A-----AKERWPQ-----LAAALGQ---             | 105 |
| <i>E. coli</i>         | AIWAD-----PKEVH-----DA---GGISVGDWRKA-----LANALNI---          | 119 |
| <i>M. tuberculosis</i> | ----FALR-----ADPPRRASVNEVGGTD--VLVP---GYLYHYSLDAGQAGRELFGTAH | 186 |
| <i>S. aureus</i>       | TKEQAMLADGSIKQDQYDKQLLSKIGKSQDLDELSSKDLQVLAIFRE--M-----      | 188 |
| <i>S. epidermidis</i>  | RKEQLMLEDGSIQEQFDTQLRNKIGKKQLKQLTKKDLQVLAIFYRE--M-----       | 188 |
| <i>P. aeruginosa</i>   | -----DTKLFA---DRIEQN-----AERE---FIYLVVRG-----                | 128 |
| <i>E. coli</i>         | -----PLDQLS---ARINAN-----PKGR---FIYLARQ-----                 | 142 |
| <i>M. tuberculosis</i> | AVVGALHPFDDTLNDFQLLAEQASSSTQPLDLVTLHADDSNRVAAAIGQLPGVVITPQAE | 246 |
| <i>S. aureus</i>       | -----NAGTVLDFQMIKNEDVSE-----KEYAAVSQQLSKLPGVNNTSMWD          | 229 |

*S. epidermidis* -----NAGSTLDEQTIKNEVDSE-----KEYAASVQQLSKLPGVNTTMDWD 229  
*P. aeruginosa* -----LTPEQ-----GEGVIALKVPGVYSIEEFR 152  
*E. coli* -----VNEEDM-----ADYIKKLKLPGLHLEERSR 166

*M. tuberculosis* L-LSTD-----KHFAP-----AVLNDVKKAVVDELDKAG 275  
*S. aureus* RKYFYGDTLRGIFGDVSTPAEGIPKELTEHYLSKGYSRNDRVGKSYLEYQYEDVLKGGKKK 289  
*S. epidermidis* RKYFYGDTLRGIFGDVSTSTEGIPKELTEQYLSKGYSRNDRVGKSYLEYQYEDVLKGGTKK 289  
*P. aeruginosa* RFYFAGEVVAHAVGF-----TDVDDRREGIELAFDEWLAGVPG 191  
*E. coli* RYFESGEVTAHLIGF-----TNVDSQGIQEGVEKSFDKWLTGQPG 205

*M. tuberculosis* WRVSVNQNGVDVSVLHEV-APSPASSVSITLDRVVQNA-----QHAVNT---RG----G 323  
*S. aureus* EMKYTTDKSGKVTSSSEVLN-PGARGQDLKLTIDIDLQKEVEALLDKQIKKLRSQGAKDMD 348  
*S. epidermidis* QMKYTTDKSGRVISSEVLN-PGSRGHDQLQTLTIDIDLQKKVESLLEKQISKLRSQGAKDMD 348  
*P. aeruginosa* KRQVLKDRRGRVIKDVQVTKNAPKGTALALSIDLRLQYLAHRELNRALLE---NGA---K 245  
*E. coli* ERIVRKDRYGRVIEDISSTD-SQAHNLAALSIDERLQALVYRELNNAVAF---NKA---E 258

**Figure S4.** Alignment of CYP51 enzyme sequences from selected fungi in the study. The gray regions correspond to non-similar and non-identical amino acids. The red regions correspond only to identical amino acids. The yellow regions are similar amino acids. The black boxes represent the active site amino acids.

*A. flavus* LVFHWIPPIGSTITHYGMDPYGFFFSCKREKYGDIETITLIGRPTTVYLGTCQNEFIFLNGKL 97  
*C. glabrata* LVFYNIPIVWGSAPYGTTPYEFEDCQKKYGDIFSTMLIGRIMTVYLGPKGHEFIFNAKL 118  
*C. albicans* LVFYNIPIVWGSAAHYGQDPYEFESCRQKYGDVFSFMLIGKIMTVYLGPKGHEFVFNAKL 109  
*C. tropicalis* MVFYNIPIVWGSAAHYGQDPYEFETKRLKYGEVFSFMLIGKIMTVYLGPKGHEFIYNAKL 109

*A. flavus* KDVNAEEVYSPLTTPVFGSDVYVDCPNSKLLIEQKKETNFGLSQAALAEAHVPLTEKEVED 157  
*C. glabrata* ADVSAEAAYSHLTTPVFGKGVYIYDCPNHRLMEQKKFVKGALTKEAFVRYVPLIAEETIKY 178  
*C. albicans* SDVSAEDAYKHLTTPVFGKGVYIYDCPNSRLMEQKKFAKFALTDSFKRYVPKIREEILNY 169  
*C. tropicalis* SDVSAEAAYSHLTTPVFGKGVYIYDCPNSRLMEQKKFAKFALTDSFKTYVPKIREEVLNY 169

*A. flavus* LAMSPNEHG---TSCQVDIPAAAMITITFTAGSALQCEEVRSKLTTEFAVLYHDLDKQET 214  
*C. glabrata* FRNSKNFKINENNSCIVDVMVSQPEMTITFTASRSLGKEMRDKLDTFAYLYSDLDKQET 238  
*C. albicans* FVTDESEKLEKETHGVANVMKTQPEITITFTASRSLFGDEMRRIFDRSFAQLYSDLKQET 229  
*C. tropicalis* FVNDVSEKTKERDHEVASVMKTQPEITITFTASRSLFGDEMRSFDRSFAQLYADLDKQET 229

*A. flavus* EINEVFFNLPLPYNKRRDAAHARMRSIYIDITNKRENAGDNVPEKLDMIGNLMQCTYKNG 274  
*C. glabrata* EINEVFFNLPLPYYRKRDAHAQQAISGTYSMLIKEREKNDIQ-NRDLIDELMKNSTYKDG 297  
*C. albicans* EINEVFFNLPLPHYWRRDAAQKKISATYMKIKSRDRDGDIDPNRDLIDSLLIHSTYKDG 289  
*C. tropicalis* EINEVFFNLPLPHYWRRDAAQRKISAHYMKIKRRRESGDIDPKRDLIDSLLVNSTYKDG 289

*A. flavus* QPLPKETIAHIMTLLMAGQHSSSSISWIMIRLASQFAVVEELYQEQLANLERTGPNGS 334  
*C. glabrata* TKMTDQEIALLGVLMGGQHTSAATSANCLLHLAERPDVQEELYQEQMRVLN-----ND 352  
*C. albicans* VKMTDQEIALLGVLMGGQHTSASTSANFLLHLGEKHLQDVIYQEVVELLKEKG--GD 347  
*C. tropicalis* VKMTDQEIALLGVLMGGQHTSASTSANFLLHLAEQQLQDDLYEELTNLLKEKG--GD 347

*A. flavus* LAPQYKDFDNLPLHQNVIETLRLHSSIHSLLRKVKNPLPVGTPPVIFITSHVLLAAPG 394  
*C. glabrata* TKEITVDDLQNMPLLNQMIKETLRLHPLHSLFRKVMRDVAIENTSVVVERDYHVLVSPG 412  
*C. albicans* LNDITYEDLQKLPSVNNTIKETLRLMPLHSIFRKVTNPLRIEENNVIFKGYHVLVSPG 407  
*C. tropicalis* LNDITYEDLQKLPLVNNTIKETLRLMPLHSIFRKVMNPLRVENKVIKGYHVLVSAQ 407

**Figure S5.** Alignment of SAP-2 enzyme sequences from selected fungi in the study. The gray regions correspond to non-similar and non-identical amino acids. The red regions correspond only to identical amino acids. The yellow regions are similar amino acids.

*C. albicans* -----MFLKNIFALALALLVDATPTT-----KRSAGFVALDFSIVK 38  
*C. tropicalis* MVWVIGLMKQVFISIVFGLTVEGLAISKLNDRGAAPGLMGNFFDKRSTPGVLSLELYVNR 60

*C. albicans* TPKAFPVTNG---QEGKTSKRQAVPTLHNEQVTYAADITVGSNNQKLNIVIDTGSSDI 94  
*C. tropicalis* NHDDSNFTIGPHFVNEYSKRDDYISVELYNEQVTYSANFTVGSNSQKQNVIVDTGSSDI 120

*C. albicans* WVPVNVDCQVTVSDQTADEFCKQKSTYDPSGSSASQDINTPEKIGYGDGSSSQGTLYKDT 154

|                      |                                                                 |     |
|----------------------|-----------------------------------------------------------------|-----|
| <i>C. tropicalis</i> | WVVSANCOEK-EGYSSDYCFSGSTYDPSSSSSTIEELGKSENRIRYGDGSSSSSGTWVKDT   | 179 |
| <i>C. albicans</i>   | VGFGGVSIKNOVLADVDSTSIDQGILGVGYKTNEAG-GSYDNVPVTLNKKQCVIAKNAYSL   | 213 |
| <i>C. tropicalis</i> | VGINGAILNQQFGDVNSTSVSQGILGIGLDTNESTDITIVENFFPINLKEQGFINTNAYSL   | 239 |
| <i>C. albicans</i>   | YLNSEDAATGQIIFGGVDNAKYSSESLIALPVTSDRELRLISLGSVEVSGKTIINTDNVDVIV | 273 |
| <i>C. tropicalis</i> | YLNAPSATSGTIIFGGIDHAKYTGSLLTTLPLTSNREFTIQTN SATVGTSTID-INTGLIL  | 298 |
| <i>C. albicans</i>   | DSGTTITTYLQQDLAQIIFAFNGKLTQDSNGNSFIEVDCNLSGDVVFNFSSKNAKISVFEAS  | 333 |
| <i>C. tropicalis</i> | DSGTTITTYLPOSVVSIANAIGCDIYNRP-IGAYIWSNCRNGKVTYNEFQGLNIDIFYS     | 357 |
| <i>C. albicans</i>   | EFVASSLQGDDEQPYDKQLLF-DVNDANILGDNFLRSAYIVYDLDNEISLAQVKYTSAS     | 392 |
| <i>C. tropicalis</i> | DLAVPLYYNSGAVAGFCAIGILYGENFNLGDNFLRHAYVVYNLDALTISLAPVVTSDS      | 417 |
| <i>C. albicans</i>   | SISALT                                                          | 398 |
| <i>C. tropicalis</i> | NVTIV-                                                          | 422 |

**Figure S6.** Alignment of DHFR enzyme sequences from selected fungi in the study. The gray regions correspond to non-similar and non-identical amino acids. The red regions correspond only to identical amino acids. The yellow regions are similar amino acids.

|                      |                                                               |     |
|----------------------|---------------------------------------------------------------|-----|
| <i>C. glabrata</i>   | -MSK-VPVVGII-----VAALLPEMGIGFQGNLFW-RLAKEMKYEREVTTLTNDNSK     | 48  |
| <i>C. albicans</i>   | -MLK-PNVAI I-----VAALKPALGIGYKSKMPW-RLRKEIRYFKDVTTRTTKPNT     | 48  |
| <i>C. tropicalis</i> | MQSK-PVISII-----VAALKPSLGIGNNGKMPW-RLRKEIRYFKDVTSKTTVENS      | 49  |
| <i>A. flavus</i>     | MP-PTNPLTLIVATTPIPTRE---KTLGLGTLNGLTLPWPRIKADMSFARVTTTRPPRPGT | 56  |
| <i>T. rubrum</i>     | MPAKLPPLTLVATTPITPTNPNGILKLIGIGKESTLWMPRIKKDMSFARVTTTRPPATAT  | 60  |
| <i>C. glabrata</i>   | -----QNVVIMGRKTTWESIEQKFRPLPKRINVVVSRSFDFGELRKVEDG-----       | 91  |
| <i>C. albicans</i>   | -----RNAVIMGRKTTWESIEQKFRPLPDRNLNIIILSRSYENEII--DDN-----      | 89  |
| <i>C. tropicalis</i> | -----RNAVIMGRKTTWESIEQKFRPLPDRNLNIIILSRSYENEII--DEN-----      | 90  |
| <i>A. flavus</i>     | -----TNAMIMGRKTYDSVPSLRPLGKRINVIIVTRDVEGVSKRVAEE-LKEKR---     | 104 |
| <i>T. rubrum</i>     | ASGSASPAINAVIMGRKTYDSIEQKFRPLSKRLNVIITRDESGSVKERAIADWNASRKRE  | 120 |
| <i>C. glabrata</i>   | -----IYHSNSLRNCLTALQSSLA-----NENK                             | 114 |
| <i>C. albicans</i>   | -----IIHASSIE-----SSLN-----LVSD                               | 105 |
| <i>C. tropicalis</i> | -----IIHANSVE-----SSLS-----FMSN                               | 106 |
| <i>A. flavus</i>     | ----AKMAAAAAAATSAGENKEEGPITDAIVSSGLEAALEDVEEKF-----KGG        | 149 |
| <i>T. rubrum</i>     | LEKQADQDQTDKAAATST----STEEPEVIVSSSLEDALSTLQRNFVISSSSDVQGKKR   | 175 |
| <i>C. glabrata</i>   | IERYIIGGGEIYRQSM-D--L-----ADHWLIITKIMPL-----PETTIPQMDT        | 155 |
| <i>C. albicans</i>   | VERVFIIGGAEIYNELINNSL-----VSHLLITEIE-H-----PSPESIEMDT         | 147 |
| <i>C. tropicalis</i> | IDRVFIIGGAEIYNELINNSL-----VTQLLITEIE-H-----SNPESVEMDT         | 148 |
| <i>A. flavus</i>     | LGSVFVIGGAEIYATALG----LGGDRPVRIVMINVEKKGV-----DGEKAVFECDT     | 197 |
| <i>T. rubrum</i>     | LGNVYIMGGSEIYASSLRLTADALGENNPLRIVMDIRRRADGNAQCQDVEDLVDGFECDT  | 235 |
| <i>C. glabrata</i>   | FLQKQ---ELEQRFYDNSDKLVDFLPSIIQLEERLTSQEWNGELVKGIPVQEKGYQFYF   | 211 |
| <i>C. albicans</i>   | FLKFP----LESWTKQPKSELQKFVGDTV-LEDD-----IKEGDFTYNY             | 186 |
| <i>C. tropicalis</i> | FLKFP----LEKWTQPKSELQKFVGDTV-LEDD-----INEGDFTYNY              | 188 |
| <i>A. flavus</i>     | FFPIDDELLMEKGWRKVSAAEVTEWVGEPVSGE----WKDEGE-----VRIQM         | 241 |
| <i>T. rubrum</i>     | CFPLDGKG-LKEGWNKVPSEKLAEWVGEAVSSD----WTWEGD-----IAMKI         | 278 |

**Figure S7.** Ramachandran plot of homology models generated for (A) *S. epidermidis* DNA gyrase, (B) *S. epidermidis* beta-lactamase, (C) *S. epidermidis* PBP, (D) *S. tropicalis* SAP-2, (E) DHFR from *S. tropicalis*, (F) CYP51 from *A. flavus* and (G) DHFR from *T. rubrum*. The colored regions represent the allowed and favored regions of secondary structures and the white regions represent the forbidden regions.



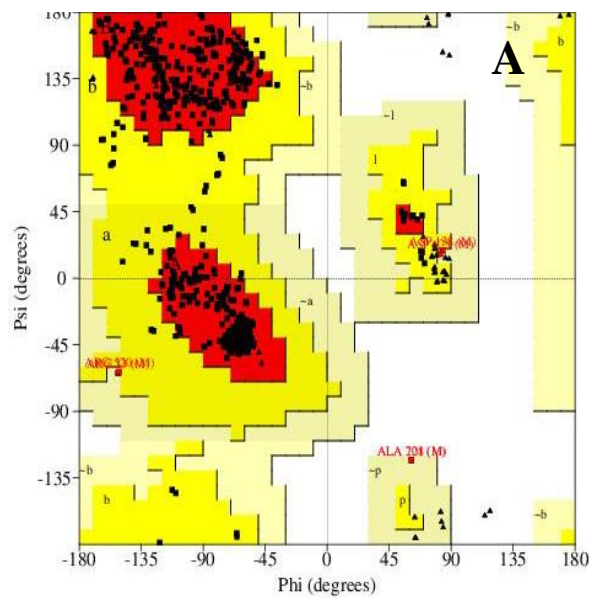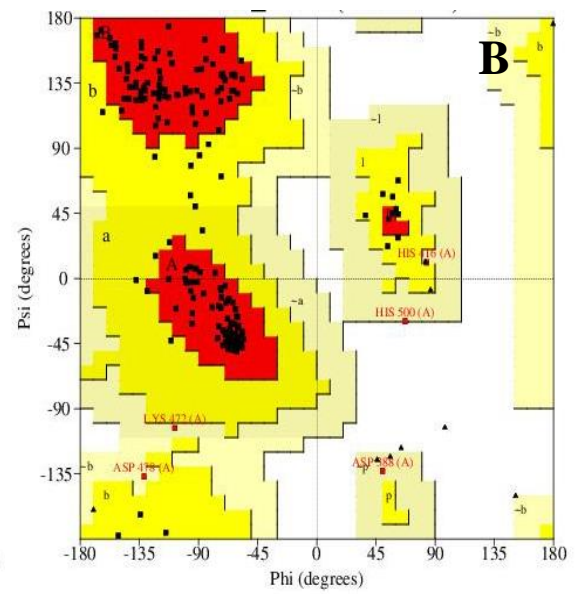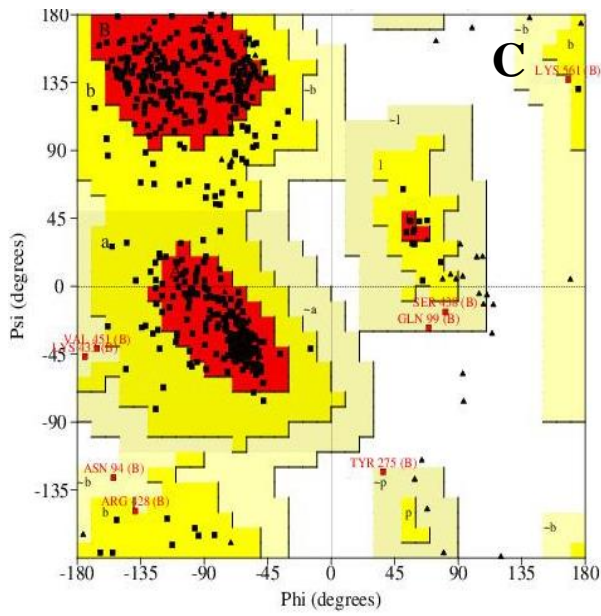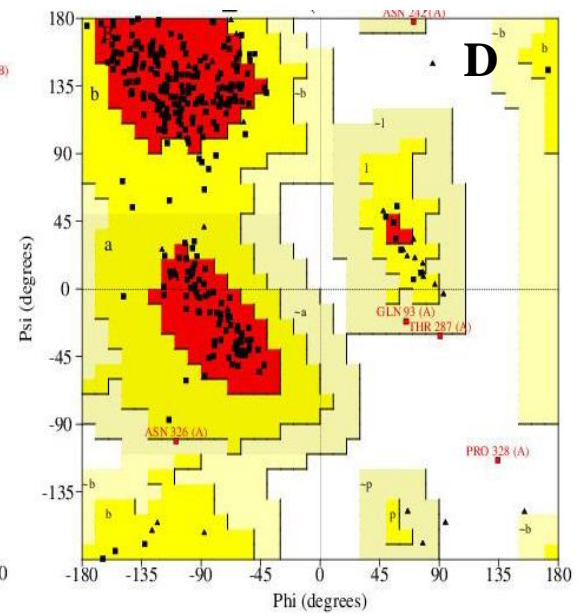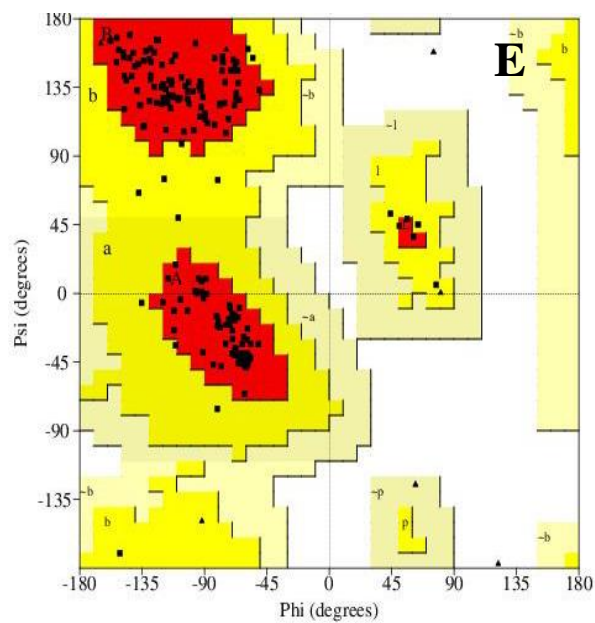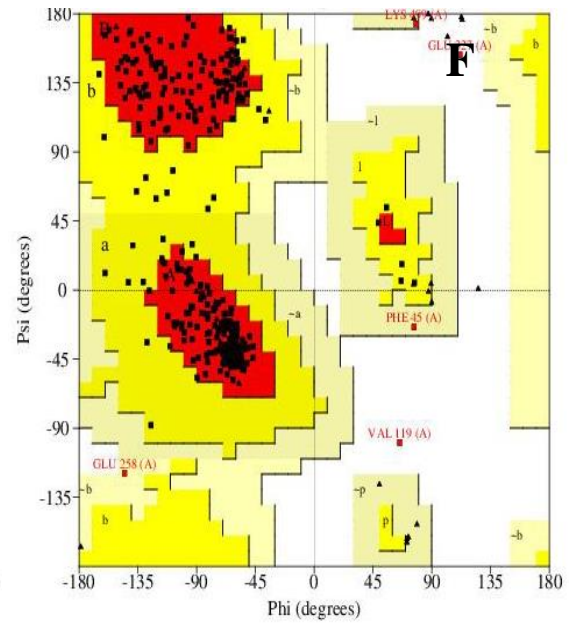

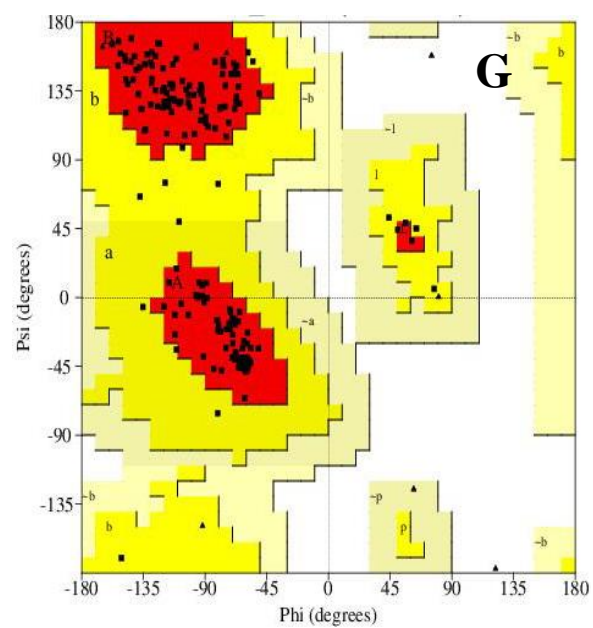

Supplement: s1 [file s1]
